# Supplementary material
Source: Springer Nature journal article supplement (https://www.springermedizin.de/resource/supplementary/12936_2011_1817_MOESM5_ESM.pdf/9541826)
Supplement: MOESM5 [file 9541826]

Results from Medline, PubMed, EMBASE, Web of Knowledge, Cochrane Database of Systematic Reviews, Google Scholar & reference lists ( $n = 785$ , excluding duplicates)

Eligible titles / abstracts ( $n = 308$ )

Application of exclusion criteria: (1) Expert opinion papers; (2) Review papers; (3) Applied research papers rated as being of 'poor' quality (as recommended by the Cochrane Handbook, 2006)

Papers included in review matrix ( $n = 60$ )

Quantitative research papers rated as 'moderate' or 'strong' ( $n = 10$ )

Qualitative research and case reports (+/- program evaluation) ( $n = 50$ )
